# Supplementary material
Source: MDPI journal article supplement (https://www.mdpi.com/2077-0472/11/9/868)
Supplement: s1 [file s1]

# Research Questionnaire

Questionnaire number \_\_\_\_\_ Survey time \_\_\_\_\_

Survey location \_\_\_\_\_ Province \_\_\_\_\_ City \_\_\_\_\_ Township \_\_\_\_\_ Village \_\_\_\_\_

Surveyor Checker \_\_\_\_\_

Respondent PID \_\_\_\_\_

## A. Basic information of the farm household

| Personal code | Relationship with the head of household | Sex                     | Age  | Education | Career                                                                                                                                                           | Technical Training |
|---------------|-----------------------------------------|-------------------------|------|-----------|------------------------------------------------------------------------------------------------------------------------------------------------------------------|--------------------|
|               | Code 1                                  | Male = 1;<br>Female = 0 | Year | Year      | Professional farming = 1<br>Part-time farming = 2<br>Self-employed = 3<br>Professional workers = 4<br>Enterprise and public institution workers = 5<br>Other = 6 | Yes = 1<br>No = 0  |
| 1             |                                         |                         |      |           |                                                                                                                                                                  |                    |
| 2             |                                         |                         |      |           |                                                                                                                                                                  |                    |
| 3             |                                         |                         |      |           |                                                                                                                                                                  |                    |
| 4             |                                         |                         |      |           |                                                                                                                                                                  |                    |
| 5             |                                         |                         |      |           |                                                                                                                                                                  |                    |
| 6             |                                         |                         |      |           |                                                                                                                                                                  |                    |
| 7             |                                         |                         |      |           |                                                                                                                                                                  |                    |
| 8             |                                         |                         |      |           |                                                                                                                                                                  |                    |

**NOTES :** Code 1: 1 head of household; 2 spouse; 3 son; 4 daughter; 5 father; 6 mother; 7 grandfather; 8 grandmother; 9 daughter-in-law; 10 son-in-law; 11 grandson; 12 granddaughter; 13 other

## B The income and expenditure of farm households and infrastructure

| Farm household income                                             | Income | Farm household expenditure                    | Expenditure |
|-------------------------------------------------------------------|--------|-----------------------------------------------|-------------|
| Income from growing food crops                                    |        | Growing food crop inputs                      |             |
| Growing cash crops (fruits, etc.)                                 |        | Growing cash crops (fruits, etc.)             |             |
| Farming income                                                    |        | Farming inputs                                |             |
| Wage income from enterprises and institutions                     |        | Expenditure on food and alcohol               |             |
| Income from outworking                                            |        | Clothing expenses                             |             |
| Income from self-employment                                       |        | Housing expenses (rent)                       |             |
| Property income (land rent, rent, etc.)                           |        | Living goods and services                     |             |
| Income from old-age pension, low-income insurance, senior citizen |        | Transportation and communication expenses     |             |
| Income from agricultural subsidies, etc.                          |        | Education, culture and entertainment expenses |             |
| Income from personal favors                                       |        | Human affairs expenses                        |             |
| Children's allowance                                              |        | Wedding and funeral expenses                  |             |
| Others, please specify                                            |        | Health care expenses                          |             |
|                                                                   |        | Insurance expenses                            |             |
|                                                                   |        | Other, please specify                         |             |
| Total income                                                      |        | Total expenses                                |             |

### C. Management information

- C01.** Your family has been operating kiwifruit for \_\_\_\_ years. Your household cultivated an area of \_\_\_\_ mu in 2014 and planted an area of kiwifruit of \_\_\_\_ mu, and in 2017 cultivated an area of \_\_\_\_ mu and planted an area of kiwifruit of \_\_\_\_ mu.
- C02.** During the Spring Festival, the number of people in your family who visited each other in various ways \_\_\_\_; the number of relatives who often visited each other \_\_\_\_; the number of friends who often visited each other \_\_\_\_; the number of relatives who often visited each other \_\_\_\_; the number of relatives who often visited each other \_\_\_\_; the number of relatives who often visited each other \_\_\_\_.
- C03.** How often does your family communicate with agricultural technicians or experts?  
1 = never; 2 = rarely; 3 = sometimes; 4 = often; 5 = frequently
- C04.** How often does your family communicate with kiwifruit farmers?  
1 = never; 2 = rarely; 3 = sometimes; 4 = often; 5 = frequently
- C05.** How often does your household communicate with village officials?  
1 = never; 2 = rarely; 3 = sometimes; 4 = often; 5 = frequently
- C06.** How often does your household communicate with new business organizations such as agricultural enterprises and cooperatives?  
1 = never; 2 = rarely; 3 = sometimes; 4 = often; 5 = frequently
- C07.** Is your household willing to sell kiwifruit through e-commerce? \_\_\_\_ 1 = Yes, 0 = No. Does your household already sell kiwifruit through e-commerce channels? \_\_\_\_ 1 = Yes, 0 = No;
- C08.** Do you think the main reasons preventing you from participating in e-commerce sales are  
1 = Internet access restrictions; 2 = inconvenient logistics; 3 = lack of leaders; 4 = lack of capital; 5 = uncompetitive products; 6 = lack of connections; 7 = other
- C09.** Has your family ever experienced online shopping? \_\_\_\_ 1 = Yes, 0 = No; Number of times your family participated in e-commerce training \_\_\_\_.
- C10.** Distance from your home to the nearest courier point \_\_\_\_ km; distance from your home to the marketplace km; distance from your home to the township \_\_\_\_ km; distance from your home to the county town \_\_\_\_ km; distance from the largest kiwifruit plantation to your home \_\_\_\_ km.
- C11.** How convenient do you think the logistics in your village are  
1 = very inconvenient ; 2 = rather inconvenient ; 3 = average ; 4 = rather convenient ; 5 = very convenient;
- C12.** Do you think the local logistics costs are ?  
1 = very low ; 2 = rather low ; 3 = average ; 4 = rather high ; 5 = very high.

# Village Questionnaire

Questionnaire number \_\_\_\_\_ Survey time \_\_\_\_\_

Survey location \_\_\_\_\_ Province \_\_\_\_\_ City \_\_\_\_\_ Township \_\_\_\_\_ Village \_\_\_\_\_

Surveyor Checker \_\_\_\_\_

1. The total population of the village is \_\_\_\_\_, and there are \_\_\_\_\_ natural villages under its jurisdiction, with the number of households \_\_\_\_\_, including the number of kiwifruit planting households \_\_\_\_\_.
2. Area of the village square \_\_\_\_\_ kilometers, arable land area \_\_\_\_\_ mu, transfer area \_\_\_\_\_ mu, including kiwifruit planting area \_\_\_\_\_ mu.
3. The number of express points in the village \_\_\_\_\_, if there is no express point, the distance of the village from the nearest express point \_\_\_\_\_ km
4. the number of rural e-commerce service points in the village \_\_\_\_\_.
5. Is there any e-commerce support policy in the village? \_\_\_\_\_ 1 = Yes, 0 = No; Are there any subsidies for e-commerce? \_\_\_\_\_ 1 = Yes, 0 = No. If yes, the form of subsidy is \_\_\_\_\_ . Number of e-commerce training sessions \_\_\_\_\_, households have participated in e-commerce training \_\_\_\_\_.
6. \_\_\_\_\_ % of cable TV coverage in the village, \_\_\_\_\_ % of computer penetration in the village, \_\_\_\_\_ % of Internet access in the village, \_\_\_\_\_ is the village network signal stable? \_\_\_\_\_ 1 = Yes, 0 = No
7. The number of households engaged in kiwifruit e-commerce in the village \_\_\_\_\_, the number of households with kiwifruit online stores \_\_\_\_\_, the number of micro-business households \_\_\_\_\_ %.
8. The number of kiwifruit cooperatives in the village \_\_\_\_\_, the number of households voluntarily joining kiwifruit e-commerce cooperatives \_\_\_\_\_.
9. Number of training sessions on kiwifruit cultivation technology in the village \_\_\_\_\_.
